# Supplementary material
Source: ML conference proceedings conference paper supplement (https://openreview.net/forum?id=fDDYcOA7h6)
Supplement: supplementary_material [file attachment]

## A. Appendix to Paper: Mathematical Theory of Adversarial Deep Learning

This appendix contains proofs for theorems in Section 3.

### A.1. Proof of Theorem 3.4

We will show that  $\text{RobM}(\mathcal{D}, \alpha)$  is computationally equivalent to the following NPC problem.

**Definition A.1** (Reversible 6-SAT). Let  $\varphi$  be a Boolean formula and let  $\bar{\varphi}$  denote the formula obtained from  $\varphi$  by negating each variable. The Boolean formula  $\varphi$  is called *reversible* if either both  $\varphi$  and  $\bar{\varphi}$  are satisfiable or both are not satisfiable. The *reversible satisfiability problem* is to recognize the satisfiability of reversible formulae in conjunctive normal form (CNF). By the *reversible 6-SAT*, we mean the reversible satisfiability problem for CNF formulae with six variables per clause. In (Megiddo, 1988), it was shown that the reversible 6-SAT is NPC.

We restate Theorem 3.4 here for convenience.

**Theorem A.2.**  $\text{RobM}(\mathcal{D}, \alpha)$  is NP-hard; that is, for  $\alpha \in \mathbb{R}_+$  and a dataset  $\mathcal{D} \subset \mathbb{R}^n \times \{-1, 1\}$ , it is NP-hard to decide whether there exists a robust network in  $\mathcal{H}_{n,2}$  for  $\mathcal{D}$  with budget  $\alpha$ .

*Proof.* Let  $\varphi(k, m) = \bigwedge_{i=1}^m \varphi_i(k, m)$  be a 6-SAT for  $k$  variables, where  $\varphi_i(k, m) = \bigvee_{j=1}^6 \tilde{x}_{i,j}$  and  $\tilde{x}_{i,j}$  is either  $x_s$  or  $\neg x_s$  for  $s \in [k]$  (refer to Definition A.1).

For  $i \in [k]$ , define  $Q_i^\varphi \in \mathbb{R}^k$  as follows:  $Q_i^\varphi[j] = 1$  if  $x_j$  occurs in  $\varphi_i(k, m)$ ;  $Q_i^\varphi[j] = -1$  if  $\neg x_j$  occurs in  $\varphi_i(k, m)$ ;  $Q_i^\varphi[j] = 0$  otherwise. Then six entries of  $Q_i^\varphi$  are 1 or  $-1$  and all other entries are zero. Also, let  $\mathbf{1}_i \in \mathbb{R}^k$ , whose  $i$ -th element is 1 and all other entries are 0.

We define a binary classification dataset  $\mathcal{D}(\varphi) = \{(x_i, y_i)\}_{i=0}^{m+4k} \subset \mathbb{R}^k \times \{-1, 1\}$  as follows

- (1)  $x_0 = 0, y_0 = -1$ .
- (2) For  $i \in [k]$ ,  $x_i = k\mathbf{1}_i, y_i = -1$ .
- (3) For  $i \in \{k+1, k+2, \dots, 2k\}$ ,  $x_i = -k\mathbf{1}_{i-k}, y_i = -1$ .
- (4) For  $i \in \{2k+1, 2k+2, \dots, 3k\}$ ,  $x_i = 2.001k\mathbf{1}_{i-2k}, y_i = 1$ .
- (5) For  $i \in \{3k+1, 3k+2, \dots, 4k\}$ ,  $x_i = -2.001k\mathbf{1}_{i-3k}, y_i = 1$ .
- (6) For  $i \in \{4k+1, 4k+2, \dots, 4k+m\}$ ,  $x_i = k/4.1 \cdot Q_{i-4k}^\varphi, y_i = -1$ .

The size of  $\mathcal{D}(\varphi)$  is  $O((m+k) \log k)$  and  $\mathcal{D}(\varphi)$  has separation bound  $k/4.1 > 1$ , because  $k \geq 6$  for 6-SAT problem.

We claim that  $\text{RobM}(\mathcal{D}(\varphi), 0.5)$  has a solution  $\mathcal{F}$  if and only if the reversible 6-SAT  $\varphi(k, m)$  has a solution  $J = \{x_j = v_j\}_{j=1}^k$ , and  $\mathcal{F}$  and  $J$  can be deduced from each other in polynomial time; that is,  $\text{RobM}(\mathcal{D}(\varphi), 0.5)$  is computationally equivalent to  $\varphi(k, m)$ . Since reversible 6-SAT is NPC (Megiddo, 1988), by the claim,  $\text{RobM}(\mathcal{D}(\varphi), 0.5)$  is NPC, which implies that  $\text{RobM}(\mathcal{D}(\varphi), \alpha)$  is NP-hard. This proves the theorem.

Before proving the claim, we first introduce a notation. Let  $J = \{x_j = v_j\}_{j=1}^k$  be a solution to the reversible 6-SAT problem  $\varphi$  and  $\varphi_i(k, m) = \bigvee_{j=1}^6 \tilde{x}_{i,j}$  a clause of  $\varphi$ , where  $v_i \in \{-1, 1\}$ . Then denote  $q(J, \varphi_i)$  to be the number of  $\tilde{x}_{i,j}$  which has value 1 on the solution  $J$ . If  $q(J, \varphi_i) = 0$ , then  $\varphi_i$  is not true. If  $q(J, \varphi_i) = 6$ , then  $\neg \varphi_i$  is not true. Since  $J$  is a solution to the reversible 6-SAT problem  $\varphi$ , we have  $1 \leq q(J, \varphi_i) \leq 5$ . It is easy to see that  $q(J, \varphi_i) = |\{j \in [k] : Q_i^\varphi[j] = v_j\}|$ .

The claim will be proved in two steps.

**Step 1.** We prove that if  $\varphi(k, m)$  has a solution  $J = \{x_j = v_j\}_{j=1}^k$ , then  $\text{RobM}(\mathcal{D}(\varphi), 0.5)$  has a solution  $\mathcal{F}$ , where  $v_i \in \{-1, 1\}$ . Let  $U_1 = \frac{2}{3k}(v_1, v_2, \dots, v_k)$ ,  $U_2 = -\frac{2}{3k}(v_1, v_2, \dots, v_k)$ . Define  $\mathcal{F} \in \mathbf{H}_{k,2}$  to be  $\mathcal{F}(x) = \psi(\sigma(U_1 x - 1) + \sigma(U_2 x - 1))$ ,  $\psi$  means the Sgn. It is clear that  $\mathcal{F}$  can be obtained from  $J$  in  $\text{Poly}(k)$ . We will show that  $\mathcal{F}(x)$  is a robust memorization of  $\mathcal{D}(\varphi)$  with budget 0.5. The proof will be given in five steps: (c1) - (c5).

(c1) Since  $\|U_1\|_1 = 2/3$ , we have that  $U_1 x - 1 > 1/3$  implies  $U_1(x + \epsilon) - 1 > 0$  for any  $\epsilon \in \mathbb{R}^k$  satisfying  $\|\epsilon\|_\infty \leq 0.5$ , and  $U_1 x - 1 \leq -1/3$  implies  $U_1(x + \epsilon) - 1 \leq 0$  for any  $\|\epsilon\|_\infty \leq 0.5$ .  $U_2$  has similar properties.

(c2) Since  $U_1 x_0 - 1 = -1 < -1/3$  and  $U_2 x_0 - 1 = -1 < -1/3$ , from (c1), for any  $\|\epsilon\|_\infty \leq 0.5$ , we have  $\mathcal{F}(x_0 + \epsilon) =$

$\psi(\sigma(U_1(x_0 + \epsilon) - 1) + \sigma(U_2(x_0 + \epsilon) - 1)) = \psi(0 + 0) = 0 = y_0$ . Thus  $\mathcal{F}$  is robust at  $x_0$  with budget 0.5.

(c3) For  $i \in [2k]$ , we have that  $U_1 x_i - 1 \leq -1 + |U_1||x_i| = -1 + k \cdot 2/(3k) = -1/3$  and  $U_2 x_i - 1 \leq -1 + |U_2||x_i| = -1 + k \cdot 2/(3k) = -1/3$ . By (c1), for any  $\|\epsilon\|_\infty \leq 0.5$ , we have

$$\mathcal{F}(x_i + \epsilon) = \psi(\sigma(U_1(x_i + \epsilon) - 1) + \sigma(U_2(x_i + \epsilon) - 1)) = \psi(0 + 0) = 0 = y_i.$$

Thus  $\mathcal{F}$  is robust at  $x_i$  with budget 0.5.

(c4) For  $i \in \{2k + 1, 2k + 2, \dots, 4k\}$ , since  $U_1 = -U_2$ , at least one of the following two inequalities  $U_1 x_i - 1 = -1 + |U_1||x_i| = -1 + 2.001k \cdot 2/(3k) > 1/3$  and  $U_2 x_i - 1 = -1 + |U_2||x_i| = -1 + 2.001k \cdot 2/(3k) > 1/3$  is true, say the first one is true. By (c1), for any  $\|\epsilon\|_\infty \leq 0.5$ , we have

$$\mathcal{F}(x_i + \epsilon) = \psi(\sigma(U_1(x_i + \epsilon) - 1) + \sigma(U_2(x_i + \epsilon) - 1)) \geq \psi(\sigma(U_1(x_i + \epsilon) - 1)) = 1 = y_i.$$

Thus  $\mathcal{F}$  is robust at  $x_i$  with budget 0.5.

(c5) Let  $i \in \{4k + 1, 4k + 2, \dots, 4k + m\}$ . It is clear that  $q(J, \varphi_{i-4k}) + q(J, \bar{\varphi}_{i-4k}) = 6$ . Then

$$\begin{aligned} & U_1 Q_{i-4k}^\varphi \\ &= \sum_{j: x_j \in \varphi_{i-4k}} v_j Q_{i-4k}^\varphi[j] \\ &= \sum_{j: x_j \in \varphi_{i-4k}, \text{Sgn}(Q_{i-4k}^\varphi[j]) = \text{Sgn}(v_j)} \frac{2}{3k} - \\ & \quad \sum_{j: x_j \in \varphi_{i-4k}, \text{Sgn}(Q_{i-4k}^\varphi[j]) \neq \text{Sgn}(v_j)} \frac{2}{3k} \\ &= q(J, \varphi_{i-4k}) \frac{2}{3k} - q(J, \bar{\varphi}_{i-4k}) \frac{2}{3k} \\ &\in \{0, 2 \cdot (2/(3k)), 4 \cdot (2/(3k)), -2 \cdot (2/(3k)), -4 \cdot (2/(3k))\}, \end{aligned}$$

which means  $|U_1 Q_{i-4k}^\varphi| \leq 8/(3k)$ . Similarly, we also have  $|U_2 Q_{i-4k}^\varphi| \leq 8/(3k)$ . As a consequence,  $U_1 x_i - 1 = -1 + U_1 Q_{i-4k}^\varphi \cdot k/4.1 \leq -1 + 8/(3k) \cdot k/4.1 \leq -1 + 2/3 = -1/3$ , and similarly  $U_2 x_i - 1 \leq -1/3$ . By (c1), for any  $\|\epsilon\|_\infty \leq 0.5$ , we have that

$$\mathcal{F}(x_i + \epsilon) = \psi(\sigma(U_1(x_i + \epsilon) - 1) + \sigma(U_2(x_i + \epsilon) - 1)) = \psi(0 + 0) = y_i.$$

Thus  $\mathcal{F}$  is robust at  $x_i$  with budget 0.5.

From (c2) to (c5),  $\mathcal{F}$  is a robustness memorization of  $\mathcal{D}(\varphi)$  with budget 0.5, and Step 1 is proved.

**Step 2. We prove that if RobM( $\mathcal{D}(\varphi)$ , 0.5) has a solution  $\mathcal{F}(x) = \psi(\sigma(U_1 x + b_1) + \sigma(U_2 x + b_2)) \in \mathbf{H}_{k,2}$  which is a robust memorization of  $\mathcal{D}(\varphi)$  with budget 0.5, then  $\varphi(k, m)$  has a solution.**

Without loss of generality, we can assume that  $U_1 \neq 0$  and  $U_2 \neq 0$ . **We will show that  $J = \{x_i = \text{Sgn}(U_1^{(i)})\}_{i=1}^k$  is the solution to the reversible 6-SAT problem  $\varphi(k, m)$ .** The proof is divided into six steps: (d1) - (d7).

(d1) We will show that it can be assumed  $b_1 = b_2 = -1$ . Since  $\mathcal{F}$  is robust at  $x_0 = 0$  with budget 0.5 and  $y_0 = 0$ , we have that  $0 = \mathcal{F}(x_0 + 0.1 \text{Sgn}(U_1)) = \mathcal{F}(0.1 \text{Sgn}(U_1)) \geq \psi(\sigma(0.1 U_1 \text{Sgn}(U_1) + b_1)) = \psi(\sigma(b_1 + 0.1 |U_1|_1))$ , which implies  $b_1 < 0$ . Similarly,  $b_2 < 0$ . Then, we can assume  $b_1 = b_2 = -1$ , because

$$\begin{aligned} \mathcal{F}(x) &= \psi(\sigma(U_1 x + b_1) + \sigma(U_2 x + b_2)) \\ &= \psi(|b_1| \sigma(\frac{U_1}{|b_1|} x - 1) + |b_2| \sigma(\frac{U_2}{|b_2|} x - 1)) \\ &= \psi(\sigma(\frac{U_1}{|b_1|} x - 1) + \sigma(\frac{U_2}{|b_2|} x - 1)). \end{aligned}$$

(d2) We prove  $\|U_1\|_1 \leq 2$  and  $\|U_2\|_1 \leq 2$ . Since  $\mathcal{F}$  is robust at  $x_0 = 0$  with budget 0.5, we have that

$$\begin{aligned} 0 &= \mathcal{F}(0.5 \text{Sgn}(U_1)) \\ &= \psi(\sigma(0.5 U_1 \text{Sgn}(U_1) - 1) + \sigma(0.5 U_2 \text{Sgn}(U_1) - 1)) \\ &\geq \psi(\sigma(0.5 \|U_1\|_1 - 1)), \end{aligned}$$

which implies  $\|U_1\|_1 \leq 2$ . Similarly, we have  $\|U_2\|_1 \leq 2$ .

(d3) We prove that  $U_1^{(j)}U_2^{(j)} < 0$  for all  $j \in [k]$ , where  $U_i^{(j)}$  is the  $j$ -th component of  $U_i$ .

(d3.1) For  $i \in \{2k+1, 2k+2, \dots, 4k\}$ , since  $\mathcal{F}(x_i) = \psi(\sigma(U_1x_i - 1) + \sigma(U_2x_i - 1)) = 1 > 0$ , at least one of  $U_1x_i - 1 > 0$  or  $U_2x_i - 1 > 0$  is valid.

Assume  $U_1^{(j)} \geq 0$  and  $U_2^{(j)} \geq 0$  for some  $j \in [k]$ . Then we have  $U_1x_{3k+j} - 1 = -1 - 2.001kU_1^{(j)} < 0$  and  $U_2x_{3k+j} - 1 = -1 - 2.001kU_2^{(j)} < 0$ , which contradict to (d3.1).

Assume  $U_1^{(j)} \leq 0$  and  $U_2^{(j)} \leq 0$  for some  $j \in [k]$ . Then we have  $U_1x_{2k+j} - 1 = -1 + 2.001kU_1^{(j)} < 0$  and  $U_2x_{2k+j} - 1 = -1 + 2.001kU_2^{(j)} < 0$ , which contradicts to (d3.1). Then (d3) is proved.

(d4) For any  $j \in [k]$ , we have  $k|U_1^{(j)}| \leq 1 - 0.5\|U_1\|_1$  and  $k|U_2^{(j)}| \leq 1 - 0.5\|U_2\|_1$ .

For  $i \in [2k]$ , because  $\mathcal{F}(x_i) = \psi(\sigma(U_1(x_i + \epsilon) - 1) + \sigma(U_2(x_i + \epsilon) - 1)) = 0$  is stand for any  $\|\epsilon\|_\infty \leq 0.5$ , so we have  $U_1(x_i + \epsilon) - 1 \leq 0$  and  $U_2(x_i + \epsilon) - 1 \leq 0$ ; that is  $U_1x_i - 1 \leq -0.5\|U_1\|_1$  and  $U_2x_i - 1 \leq -0.5\|U_2\|_1$ .

For any  $j \in [k]$ , we have  $U_1x_j \leq 1 - 0.5\|U_1\|_1$  and  $U_1x_{k+j} \leq 1 - 0.5\|U_1\|_1$ , considering that the  $j$ -th component of  $x_j$  and  $x_{k+j}$  has different positive and negative, so one of them has the same positive and negative with the  $j$ -th component of  $U_1^{(j)}$ , so  $\max\{U_1x_j, U_1x_{k+j}\} = k|U_1^{(j)}| \leq 1 - 0.5\|U_1\|_1$ . Similar, we have  $k|U_2^{(j)}| \leq 1 - 0.5\|U_2\|_1$ .

(d5) For any  $j \in [k]$ , we have  $2.001|kU_1^{(j)}| > 1 + 0.5\|U_1\|_1$  and  $2.001|kU_2^{(j)}| > 1 + 0.5\|U_2\|_1$ .

For  $j \in [k]$ , by (d3), we first assume that  $U_1^{(j)} > 0$  and  $U_2^{(j)} < 0$ . We will prove the following conclusions about this  $j$ .

(d5.0) For  $i \in \{2k+1, 2k+2, \dots, 4k\}$ , since  $\mathcal{F}(x_i) = \psi(\sigma(U_1(x_i + \epsilon) - 1) + \sigma(U_2(x_i + \epsilon) - 1)) = 1 > 0$  is valid for  $\|\epsilon\|_\infty \leq 0.5$ , at least one of  $U_1(x_i + \epsilon) - 1 > 0$  or  $U_2(x_i + \epsilon) - 1 > 0$  is valid.

(d5.1)  $U_2^{(j)} < -\frac{1}{2.001k}$ . By (d5.0), at least one of  $U_1x_{3k+j} - 1 > 0$  and  $U_2x_{3k+j} - 1 > 0$  is valid. Since  $U_1x_{3k+j} - 1 = -1 - 2.001kU_1^{(j)} < -1 < 0$  (by  $U_1^j > 0$ ), we have  $U_2x_{3k+j} - 1 = -1 - 2.001kU_2^{(j)} > 0$ ; that is,  $U_2^{(j)} < -\frac{1}{2.001k}$ .

(d5.2)  $U_2(x_{2k+j} + \epsilon) - 1 < 0$  for any  $\|\epsilon\|_\infty \leq 0.5$ . By (d2) and (d5.1), we have

$$\begin{aligned} U_2(x_{2k+j} + \epsilon) - 1 &\leq U_2x_{2k+j} + 0.5\|U_2\|_1 - 1 \\ &\stackrel{(d2)}{\leq} U_2x_{2k+j} + 0.5 \cdot 2 - 1 \\ &\stackrel{(d5.1)}{\leq} -\frac{1}{2.001k} \cdot 2.001k + 0.5 \cdot 2 - 1 \\ &< 0. \end{aligned}$$

(d5.3)  $2.001kU_1^{(j)} > 1 + 0.5\|U_1\|_1$ . By (d5.0), for any  $\|\epsilon\|_\infty \leq 0.5$ , at least one of  $U_1(x_{2k+j} + \epsilon) - 1 > 0$  or  $U_2(x_{2k+j} + \epsilon) - 1 > 0$  is valid. By (d5.2), we have  $U_2(x_{2k+j} + \epsilon) - 1 < 0$  for any  $\|\epsilon\|_\infty \leq 0.5$ . So  $U_1(x_{2k+j} + \epsilon) - 1 > 0$  is valid for any  $\|\epsilon\|_\infty \leq 0.5$ . Then we have  $U_1x_{2k+j} - 1 > 0.5\|U_1\|_1$ ; that is  $2.001kU_1^{(j)} > 1 + 0.5\|U_1\|_1$ .

(d5.4)  $-2.001kU_2^{(j)} > 1 + 0.5\|U_2\|_1$ . This can be proved similar to (d5.3).

If we replace  $U_1^{(j)} > 0$  and  $U_2^{(j)} < 0$  with  $U_1^{(j)} < 0$  and  $U_2^{(j)} > 0$ , then we can obtain  $-2.001kU_1^{(j)} > 1 + 0.5\|U_1\|_1$  and  $2.001kU_2^{(j)} > 1 + 0.5\|U_2\|_1$ . So, for any  $j \in [k]$ , we finally obtain  $2.001|kU_1^{(j)}| > 1 + 0.5\|U_1\|_1$  and  $2.001|kU_2^{(j)}| > 1 + 0.5\|U_2\|_1$ .

(d6) For any  $j \in [k]$ , we have  $\frac{2/3-0.001}{k} < |U_1^{(j)}| < \frac{2/3+0.001}{k}$  and  $\frac{2/3-0.001}{k} < |U_2^{(j)}| < \frac{2/3+0.001}{k}$ .

For any  $j \in [k]$ , by (d4) and (d5), we know that  $\frac{1-0.5\|U_1\|_1}{k} \geq |U_1^{(j)}| > \frac{1+0.5\|U_1\|_1}{2.001k}$ .

(d6.1)  $|U_1^{(j)}| > \frac{2/3-0.001}{k}$ . Let  $e = \operatorname{argmin}_{j \in [k]} \{|U_1^{(j)}|\}$ . Then by (d5), we have that  $|U_1^{(e)}| > \frac{1+0.5\|U_1\|_1}{2.001k} \geq \frac{1+0.5k|U_1^{(e)}|}{2.001k}$ ; that is  $|U_1^{(e)}| > \frac{2/3-0.001}{k}$ . So for any  $j \in [k]$ , we have that  $|U_1^{(j)}| \geq |U_1^{(e)}| > \frac{2/3-0.001}{k}$ .

(d6.2)  $|U_1^{(j)}| < \frac{2/3+0.001}{k}$ . By (d6.1), we have  $\|U_1\|_1 > k|U_1^{(e)}| > 2/3 - 0.001$ . Then we have  $|U_1^{(j)}| \leq \frac{1-0.5\|U_1\|_1}{k} < \frac{2/3-0.001}{k}$ .

$$\frac{1-1/3+0.0005}{k} < \frac{2/3+0.001}{k}.$$

(d6.1) and (d6.2) prove the inequality for  $U_1$ . The inequality for  $U_2$  can be proved similarly.

(d7) We show that  $\{x_i = \text{Sgn}(U_1^{(i)})\}_{i=1}^k$  is the solution of the reversible 6-SAT problem  $\varphi$ .

Assume that  $J = \{x_i = \text{Sgn}(U_1^{(i)})\}_{i=1}^k$  is not the solution of  $\varphi$ . Then there exists a clause, say  $\varphi_1$ , such that  $\varphi_1 = 0$  at  $J$ , or  $\bar{\varphi}_1 = 0$  at  $J$ ; that is,  $q(J, \varphi_1) = 0$  or  $q(J', \varphi_1) = 0$ , where  $J' = \{x_i = \text{Sgn}(U_2^{(i)})\}_{i=1}^k$ . Then, we have

$$\begin{aligned} & \mathcal{F}(x_{4k+1} + 0.5\text{Sgn}(U_1)) \\ &= \psi(\sigma(U_1(x_{4k+1} + 0.5\text{Sgn}(U_1)) - 1) + \sigma(U_2(x_{4k+1} + 0.5\text{Sgn}(U_1)) - 1)) \\ &\geq \psi(\sigma(U_1(x_{4k+1} + 0.5\text{Sgn}(U_1)) - 1)) \\ &\stackrel{(d6)}{\geq} \psi(\sigma(U_1 x_{4k+1} + 0.5k \cdot \frac{2/3-0.001}{k} - 1)) \\ &\stackrel{(d6)}{\geq} \psi(\sigma(6 \cdot \frac{2/3-0.001}{k} \cdot \frac{k}{4.1} + 0.5k \cdot \frac{2/3-0.001}{k} - 1)) \\ &\geq \psi(\sigma(0.97 + 0.1 - 1)) \\ &= 1 \neq y_{4k+1}. \end{aligned}$$

Then the robustness budget of  $\mathcal{F}$  is smaller than 0.5 at  $x_{4k+1}$ , which contradicts to the fact that  $\mathcal{F}$  is a solution to  $\text{RobM}(\mathcal{D}(\varphi), 0.5)$ . Therefore,  $J = \{x_i = \text{Sgn}(U_1^{(i)})\}_{i=1}^k$  is a solution to  $\varphi$ . This proves Step 2.  $\square$

## A.2. Proof of Theorem 3.6

We will show that  $\text{RobM}(\mathcal{D}, \alpha)$  is computationally equivalent to the following NPC problem (Garey & Johnson, 1979).

**Definition A.3** (Minimum vertex cover). A *vertex cover* in a graph  $G$  is a set of vertices of  $G$  such that each edge of  $G$  has at least one of its end point in this set. A *minimum vertex cover* in a graph  $G$  is a vertex cover that has the smallest number of vertices among all possible vertex covers of  $G$ .

We restate Theorem 3.6 for convenience.

**Theorem A.4.**  $\text{MinRob}(\mathcal{D}, \alpha)$  is NP-hard; that is, finding the smallest  $k$  such that there exists a robust network with budget  $\alpha$  in  $\mathcal{H}_{n,k}$  is NP-hard.

*Proof.* Let  $G = (V, E)$  be a graph with vertex set  $V = \{v_1, \dots, v_p\}$  and edge set  $E = \{e_1, \dots, e_q\}$ . Denote  $\mathbf{1}_{a,b}(m)$  to be the vector in  $\mathbb{R}^p$ , whose  $a$ -th and  $b$ -th entries are  $m$ , and all other entries are zero. Define a binary classification dataset  $\mathcal{D}(G) = \{(x_i, y_i)\}_{i=0}^q \subset \mathbb{R}^p \times \{0, 1\}$  as follows:

- (1)  $x_0 = 0$  and  $y_0 = 0$ ;
- (2) For  $i \in [q]$ , if  $e_i$  has vertices  $v_a$  and  $v_b$ , then set  $x_i = \mathbf{1}_{a,b}(1.001)$  and  $y_i = 1$ .

The separation bound of  $\mathcal{D}(G)$  is 1.001.

We claim that the minimum vertex cover problem for  $G$  is computationally equivalent to problem  $\text{MinRob}(\mathcal{D}(G), 0.5)$ . Since the minimum vertex cover problem is NPC (Garey & Johnson, 1979), problem  $\text{MinRob}(\mathcal{D}(G), 0.5)$  is NPC, which implies that  $\text{MinRob}(\mathcal{D}, \alpha)$  is NP-hard. This proves the theorem.

We prove the claim in three steps.

**Step 1.** Let  $V_1 \subseteq V$  be a minimum vertex cover of  $G$  and  $k = |V_1|$ . Then we can compute an  $\mathcal{F} \in \mathbf{H}_{k,p}$  in time  $\text{Poly}(p)$  such that  $\mathcal{F}$  is a robust memorization of  $\mathcal{D}(G)$  with budget 0.5.

Let  $\mathcal{F}(x) = \psi(\sum_{v_j \in V_1} \sigma(2\mathbf{1}_j x - 1)) \in \mathbf{H}_{k,p}$ , where  $\mathbf{1}_j \in \mathbb{R}^{1 \times p}$  is the vector whose  $j$ -th weight is 1 and others weights are 0. It is easy to see that  $\mathcal{F}$  can be computed in  $\text{Poly}(p)$ , since  $k \leq p$ . We will verify that this network is a robustness memorization of  $\mathcal{D}(G)$  with budget 0.5, which comes from the facts (c1) and (c2) to be proved below.

(c1) For any  $\chi \in \mathbb{R}^p$  satisfying  $\|\chi\|_\infty \leq 0.5$ , we have

$$\begin{aligned}
 & \mathcal{F}(x_0 + \chi) \\
 &= \psi(\sum_{v_j \in V_1} \sigma(2\mathbf{1}_j(x_0 + \chi) - 1)) \\
 &= \psi(\sum_{v_j \in V_1} \sigma(2\mathbf{1}_j\chi - 1)) \\
 &\stackrel{(s1)}{\leq} \psi(\sum_{v_j \in V_1} \sigma(2\|\mathbf{1}_j\|_1\|\chi\|_\infty - 1)) \\
 &\leq \psi(\sum_{v_j \in V_1} \sigma(1 - 1)) = 0.
 \end{aligned}$$

In step (c1), we use the inequality  $ab \leq \|a\|_1\|b\|_\infty$  for  $a \in \mathbb{R}^{1 \times p}$  and  $b \in \mathbb{R}^{p \times 1}$ . So,  $\mathcal{F}$  is robust at  $x_0$  with budget 0.5.

(c2) For  $i \in [q]$ ,  $x_i = \mathbf{1}_{q,p}(1.001)$ . Since  $V_1$  is a vertex cover, we have  $v_a \in V_1$  or  $v_b \in V_1$ , say  $v_a \in V_1$ . Then for any  $\chi \in \mathbb{R}^p$  such that  $\|\chi\|_\infty \leq 0.5$ , we have

$$\begin{aligned}
 & \mathcal{F}(x_i + \chi) \\
 &= \psi(\sum_{v_j \in V_1} \sigma(2\mathbf{1}_j(x_i + \chi) - 1)) \\
 &\geq \psi(\sigma(2\mathbf{1}_a(x_i + \chi) - 1)) \\
 &\geq \psi(\sigma(2\mathbf{1}_a x_i - 1 - 2\|\mathbf{1}_a\|_1\|\chi\|_\infty)) \\
 &\geq \psi(\sigma(1.001 \cdot 2 - 1 - 1)) \\
 &> 0.
 \end{aligned}$$

So  $\mathcal{F}(x_i + \chi) = 1 = y_i$  for any  $i \in [q]$  and  $\mathcal{F}$  is robust at  $x_i$  with budget 0.5.

**Step 2. Let  $\mathcal{F} \in \mathbf{H}_{k,p}$  be a solution to problem  $\text{MinRob}(\mathcal{D}(G), 0.5)$ . Then we can compute a vertex cover  $V_1 \subseteq V$  of  $G$  in time  $\text{Poly}(p)$  such that  $|V_1| \leq k$ .**

Let  $\mathcal{F}(x) = \psi(\sum_{i=1}^k \sigma(U_i x + b_i))$  be such a network. Without loss of generality, we assume that  $U_t \neq 0$  for any  $t \in [k]$ . Then we have three results (d1) to (d3).

(d1) For any  $t \in [k]$ ,  $b_t < 0$  and  $\|U_t\|_1 \leq 2|b_t|$ . This is because

$$\begin{aligned}
 0 &= y_0 \\
 &= \mathcal{F}(x_0 + 0.5\text{Sgn}(U_t)) \\
 &= \mathcal{F}(0.5\text{Sgn}(U_t)) \\
 &= \psi(\sum_{i=1}^k \sigma(0.5U_i(\text{Sgn}(U_t) + b_i)) \\
 &\geq \psi(\sigma(0.5U_t(\text{Sgn}(U_t) + b_t)) \\
 &= \psi(0.5\|U_t\|_1 + b_t)
 \end{aligned}$$

which implies  $0.5\|U_t\|_1 + b_t \leq 0$  and we can deduce  $b_t < 0$  and  $\|U_t\|_1 \leq 2|b_t|$  from  $0.5\|U_t\|_1 + b_t \leq 0$ .

(d2) For any  $t \in [q]$ , let  $x_t = \mathbf{1}_{a,b}(1.001)$ . Then there exists at least one  $s \in [k]$  such that  $\frac{U_s^{(a)} + U_s^{(b)}}{|b_s|} > 2 - \frac{0.002}{0.501}$ . We have  $\|x_t - \mathbf{1}_{a,b}(0.501)\|_\infty = \|\mathbf{1}_{a,b}(1.001) - \mathbf{1}_{a,b}(0.501)\|_\infty = 0.5$ . Since  $\mathcal{F}(\hat{x}_t) = 1$  for any  $\hat{x}_t$  satisfying  $\|\hat{x}_t - x_t\|_\infty \leq 0.5$ , we have

$$\begin{aligned}
 1 &= \mathcal{F}(\mathbf{1}_{a,b}(0.501)) = \psi(\sum_{i=1}^k \sigma(U_i \mathbf{1}_{a,b}(0.501) + b_i)) \\
 &= \psi(\sum_{i=1}^k |b_i| \sigma(\frac{U_i \mathbf{1}_{a,b}(0.501)}{|b_i|} - 1))
 \end{aligned}$$

Thus at least one  $s \in [k]$  satisfies  $\frac{U_s \mathbf{1}_{a,b}(0.501)}{|b_s|} - 1 > 0$ ; that is,  $\frac{U_s^{(a)} + U_s^{(b)}}{|b_s|} > 2 - \frac{0.002}{0.501}$ .

(d3) Let  $V_1 = \{v_j : \exists i \in [k], s.t. j = \widehat{U}_i\}$ , where  $j = \widehat{U}_i \in [p]$  means that  $U_i^{(j)}$  is the largest component of  $U_i$ . It is clear that  $V_1$  can be computed from  $\mathcal{F}$  in  $\text{Poly}(p)$ . **We will show that  $V_1$  is a vertex cover of  $G$ .**

For any  $m \in [q]$ , let  $e_m = (v_a, v_b)$ . By (d2), there exists an  $s \in [k]$  such that  $\frac{U_s^{(a)} + U_s^{(b)}}{|b_s|} > 2 - \frac{0.002}{0.501}$ . By (d1), we also have  $\|U_s\|_1 \leq 2|b_s|$ . So  $\forall g \in [p]$  with  $g \neq a, b$ , we have

$$\begin{aligned} & |U_s^{(g)}| \\ & \leq \|U_s\|_1 - |U_s^{(a)}| - |U_s^{(b)}| \\ & \leq 2|b_s| - (U_s^{(a)} + U_s^{(b)}) \\ & \leq \frac{0.002|b_s|}{0.501} \\ & < (1 - \frac{0.001}{0.501})|b_s| \\ & < (U_s^{(a)} + U_s^{(b)})/2 \\ & \leq \max\{U_s^{(a)}, U_s^{(b)}\} \end{aligned}$$

which implies that  $\hat{U}_s \in \{a, b\}$ , so whether  $v_a \in V_1$  or  $v_b \in V_1$  and  $e_m$  is covered by  $V_1$ . Thus,  $V_1$  is a vertex cover of  $G$ .

### Step 3. The two problems are computationally equivalence.

Let  $V_1$  be a minimum vertex cover of the graph  $G$ . Then from Step 1, we can find a network  $\mathcal{F}_1$  with width  $|V_1|$ , which is a robust memorization of  $\mathcal{D}(G)$  with budget 0.5. On the other hand, by Step 2, if  $\mathcal{F}_1$  is not a minimum-width robust memorization of  $\mathcal{D}(G)$  with budget 0.5, then there exists a smaller vertex cover for  $G$ . So  $|V_1|$  and  $\mathcal{F}_1$  are a solution to  $\text{MinRob}(\mathcal{D}, 0.5)$ . Similarly, we can show that a solution of  $\text{MinRob}(\mathcal{D}(G), 0.5)$  leads to a minimum vertex cover for  $G$ .  $\square$

### A.3. Proof of Proposition 3.7

We restate Proposition 3.7 for convenience.

**Proposition A.5.** *If  $\mathbf{H} = \{\mathcal{F} : \mathbb{R}^n \rightarrow \mathbb{R}, \text{width}(\mathcal{F}) = w\}$  is an optimal robust memorization of any dataset  $\mathcal{D} \in \mathcal{D}_{n,N,L}$  with  $N > n$ , then  $\text{width}(\mathcal{F}) = w \geq n$ .*

*Proof.* It suffices to show that there exists an dataset  $\mathcal{D}$ , if  $\mathcal{F}$  has width less than  $n$  and memorizes  $\mathcal{D}$ , then  $\text{RA}_{\mathcal{D}}(\mathcal{F}, 0.4\lambda_{\mathcal{D}}) \leq 1 - \frac{1}{n+1}$ ; that is,  $\mathcal{F}$  is not a robust memorization of  $\mathcal{D}$  with budget  $0.4\lambda_{\mathcal{D}}$ .

Denote  $\mathbf{1}$  to be the vector all of whose weights are 1 and  $\mathbf{1}_k$  the vector whose  $k$ -th weight is 1 and all other weights are 0. Without loss of generality, let  $N$  satisfy  $(n+1)|N$ . We define a dataset  $\mathcal{D} = \{x_i, y_i\}_{i=1}^N$  with separation bound 1 as follows:

(1)  $x_1 = 0$  and  $y_1 = 0$ ;  $x_i = \mathbf{1}_{i-1}$  and  $y_i = 1$  for  $i = 2, 3, \dots, n+1$ ;

(2) for  $i = k(n+1) + 1, \dots, k(n+1) + n + 1$  and  $k = 1, \dots, \frac{N}{n+1} - 1$ ,  $x_i = x_{\bar{i}} + \mathbf{1}$  and  $y_i = y_{\bar{i}}$ , where  $\bar{i} = i \bmod (n+1)$  if  $(n+1) \nmid i$  and  $\bar{i} = n+1$  otherwise.

It is easy to see that  $\lambda_{\mathcal{D}} = 1$ .

Let  $\mathcal{F} : \mathbb{R}^n \rightarrow \mathbb{R}$  be a network which memorizes  $\mathcal{D}$  defined above. Let  $W_1$  be the weight matrix of the first layer of  $\mathcal{F}$ . Then  $W_1 \in \mathbb{R}^{K \times n}$ . We will show that, there exists an  $s$  in  $[n]$  such that

$$\exists \delta_1, \delta_s \in \mathbb{R}^n, \text{ satisfying } \|\delta_1\|_{\infty} < 0.4, \|\delta_s\|_{\infty} < 0.4, W_1(x_1 + \delta_1) = W_1(x_s + \delta_s).$$

Firstly, since  $n > K$ ,  $W_1 \in \mathbb{R}^{K \times n}$  is not of full row rank, and hence there exists a vector  $v \in \mathbb{R}^n$  such that  $W_1 v = 0$  and  $\|v\|_{\infty} = 1$ . For such a  $v$ , let  $|v^{(s)}| = 1$  for some  $s \in [n]$ . We define  $\delta_1, \delta_s \in \mathbb{R}^n$  as follows:

$$\delta_1^{(s)} = 1/3 \text{ and } \delta_1^{(k)} = -v^{(s)}v^{(k)}/3 \text{ for } k \neq s; \quad \delta_s^{(s)} = 0 \text{ and } \delta_s^{(k)} = v^{(s)}v^{(k)}/3 \text{ for } k \neq s.$$

It is clearly that  $\|\delta_1\|_{\infty} = \frac{1}{3} < 0.4$  and  $\|\delta_s\|_{\infty} = \frac{1}{3} < 0.4$ . Also,  $x_s + \delta_s - x_1 - \delta_1 = \frac{2}{3}v^{(s)}v$ . Thus,  $W_1(x_1 + \delta_1) - W_1(x_s + \delta_s) = W_1(x_1 + \delta_1 - x_s - \delta_s) = W_1(\frac{2}{3}v^{(s)}v) = 0$ .

It is easy to see that, for any  $x, z \in \mathbb{R}^n$ ,  $W_1 x = W_1 z$  implies  $\mathcal{F}(x) = \mathcal{F}(z)$ . Since  $W_1(x_1 + \delta_1) = W_1(x_s + \delta_s)$ , we have  $\mathcal{F}(x_1 + \delta_1) = \mathcal{F}(x_s + \delta_s)$ , and either  $\mathcal{F}(x_1 + \delta_1) \neq 0$  or  $\mathcal{F}(x_s + \delta_s) \neq 1$  must be valid. In other words,  $\mathcal{F}$  cannot be robust at  $x_1$  or  $x_s$  for the robust budget 0.4. Similarly,  $\mathcal{F}$  cannot be robust for at least one point in  $\{x_i\}_{i=k(n+1)+1}^{(k+1)(n+1)}$  for  $k \in \{1, \dots, \frac{N}{n+1} - 1\}$ . In summary,  $\mathcal{F}$  cannot be robust for at least  $\frac{N}{n+1}$  points, so  $\text{RA}_{\mathcal{D}}(\mathcal{F}, 0.4) \leq 1 - \frac{1}{n+1}$ .  $\square$

#### A.4. Proof of Theorem 3.9

We restate Theorem 3.9 for convenience.

**Theorem A.6.** *For any dataset  $\mathcal{D} \in \mathcal{D}_{n,N,L}$ , the hypothesis space  $\mathbf{H}_{n,2N+1,3n+1,O(Nn)}$  is an optimal robust memorization for  $\mathcal{D}$ .*

*Proof.* It suffices to show that for any  $\mu < 0.5\lambda_{\mathcal{D}}$ , there exists a network with depth  $2N + 1$ , width  $3n + 1$ , and  $O(Nn)$  nonzero parameters, which can robustly memorize  $\mathcal{D}$  with robust budget  $\mu$ .

Let  $\mathcal{D} = \{(x_i, y_i)\}_{i=1}^N \subset \mathbb{R}^n \times [L]$ . Let  $C \in \mathbb{R}_+$  satisfy  $C > |x_i^{(j)}| + \mu > 0$  for all  $i \in [N]$  and  $j \in [n]$ .

$\mathcal{F}$  will be defined in three steps for an input  $x$ .

**Step 1.** The first layer is used to check whether  $x \in \mathbb{B}(x_1, \mu)$ . The second layer is used to compute  $E_1(x)$  in Property 2 given below. The two layers are given below.

$$(1-1.1) \mathcal{F}_1^0(x) = 0;$$

$$(1-1.2) \mathcal{F}_1^j(x) = \sigma(x_1^{(j)} - x^{(j)} - \mu), \mathcal{F}_1^{n+j}(x) = \sigma(x^{(j)} - x_1^{(j)} - \mu), \text{ where } j \in [n];$$

$$(1-1.3) \mathcal{F}_1^{2n+j}(x) = \sigma(x^{(j)} + C), \text{ where } j \in [n];$$

$$(1-2.1) \mathcal{F}_2^0(x) = 0;$$

$$(1-2.2) \mathcal{F}_2^1(x) = \sigma(y_1 - \frac{y_1}{\lambda_{\mathcal{D}} - 2\mu} \sum_{k=1}^{2n} \mathcal{F}_1^k(x));$$

$$(1-2.3) \mathcal{F}_2^{j+1}(x) = \sigma(\mathcal{F}_1^{2n+j}(x)), \text{ where } j \in [n].$$

**Step 2.** For  $i = 2, 3, \dots, N$ , the  $(2i - 1)$ -th layer has width  $3n + 1$  and is used to check whether  $x \in \mathbb{B}(x_i, \mu)$ . The  $2i$  layer has width  $n + 2$  and is used to compute  $E_i(x)$  in Property 2 given below. These layers are given below.

$$(i-1.1) \mathcal{F}_{2i-1}^0(x) = \sigma(\mathcal{F}_{2i-2}^0(x) + \mathcal{F}_{2i-2}^1(x));$$

$$(i-1.2) \mathcal{F}_{2i-1}^j(x) = \sigma((x_i^{(j)} + C) - \mathcal{F}_{2i-2}^{j+1}(x) - \mu) \text{ and } \mathcal{F}_{2i-1}^{n+j}(x) = \sigma(\mathcal{F}_{2i-2}^{j+1}(x) - (x_i^{(j)} + C) - \mu), \text{ where } j \in [n];$$

$$(i-1.3) \mathcal{F}_{2i-1}^{2n+j}(x) = \sigma(\mathcal{F}_{2i-2}^{j+1}(x)), \text{ where } j \in [n];$$

$$(i-2.1) \mathcal{F}_{2i}^0(x) = \sigma(\mathcal{F}_{2i-1}^0(x));$$

$$(i-2.2) \mathcal{F}_{2i}^1(x) = \sigma(y_i - \frac{y_i}{\lambda_{\mathcal{D}} - 2\mu} \sum_{k=1}^{2n} \mathcal{F}_{2i-1}^k(x) - \mathcal{F}_{2i-1}^0(x));$$

$$(i-2.3) \mathcal{F}_{2i}^{j+1}(x) = \sigma(\mathcal{F}_{2i-1}^{2n+j}(x)), \text{ where } j \in [n].$$

**Step 3.** The output layer of  $\mathcal{F}$  is  $\mathcal{F}(x) = \mathcal{F}_{2N}^0(x) + \mathcal{F}_{2N}^1(x)$ .

Next, we will show that  $\mathcal{F}$  has the following properties.

**Property 1.**  $\mathcal{F}_{2i}^{j+1}(x) = x^{(j)} + C$  for  $i \in [N]$ ,  $j \in [n]$ , and  $x \in \mathbb{R}^n$ .

From (1-1.3) and (1-2.3), since  $C + x_i^{(j)} > \mu > 0$  for all  $i \in [N]$  and  $j \in [n]$ , we have that  $\mathcal{F}_2^{j+1}(x) = \mathcal{F}_1^{2n+j}(x) = \sigma(x^{(j)} + C) = x^{(j)} + C$ .

From (i-2.3) and (i-1.3), we have that  $\mathcal{F}_{2i}^{j+1}(x) = \sigma(\mathcal{F}_{2i-1}^{2n+j}(x)) = \sigma(\mathcal{F}_{2i-2}^{j+1}(x)) = \dots = \sigma(\mathcal{F}_2^{j+1}(x)) = x^{(j)} + C$ , for all  $i \in [N]$  and  $j \in [n]$ . Property 1 is proved.

**Property 2.** Let  $E_i(x) = y_i - \frac{y_i}{\lambda_{\mathcal{D}} - 2\mu} \sum_{j=1}^{2n} \mathcal{F}_{2i-1}^j(x)$  for  $i \in [N]$ . Then  $E_i(x) = y_i$  for  $x \in \mathbb{B}_{\infty}(x_i, \mu)$ , and  $E_i(x) < y_i$  for  $x \notin \mathbb{B}_{\infty}(x_i, \mu)$ .

Due to Property 1, for  $j \in [n]$ , step (i-1.2) becomes

$$\begin{aligned} \mathcal{F}_{2i-1}^j(x) &= \sigma((x_i^{(j)} + C) - \mathcal{F}_{2i-2}^{j+1}(x) - \mu) \\ &= \sigma(x_i^{(j)} - x^{(j)} - \mu) \\ \mathcal{F}_{2i-1}^{n+j}(x) &= \sigma(\mathcal{F}_{2i-2}^{j+1}(x) - (x_i^{(j)} + C) - \mu) \\ &= \sigma(x^{(j)} - x_i^{(j)} - \mu). \end{aligned}$$

If  $x \in \mathbb{B}_\infty(x_i, \mu)$ , then  $\sigma(x_i - x - \mu) = \sigma(x - x_i - \mu) = 0$ , which means  $\mathcal{F}_{2i-1}^j(x) = 0$  for  $j \in [2n]$ . Thus  $E_i(x) = y_i$ . If  $x \notin \mathbb{B}_\infty(x_i, \mu)$ , then  $\|x_i - x - \mu\|_\infty > 0$  or  $\|x - x_i - \mu\|_\infty > 0$  which means that  $\mathcal{F}_{2i-1}^j(x) > 0$  for at least one  $j \in [2n]$ . Since  $\mathcal{F}_i^j(x) \geq 0$  for all  $i$  and  $j$ , we have that  $E_i(x) < y_i$ .

**Property 3.** If  $x \in \mathbb{B}_\infty(x_k, \mu)$  for  $y_k \neq y_i$ , then  $E_i(x) \leq 0$ .

Since  $x \in \mathbb{B}_\infty(x_k, \mu)$  and  $y_k \neq y_i$ , we have that  $\|x_i - x - \mu\|_\infty \geq \lambda_{\mathcal{D}} - 2\mu > 0$  or  $\|x - x_i - \mu\|_\infty \geq \lambda_{\mathcal{D}} - 2\mu > 0$ , since the separation bound is  $\lambda$ . Then  $\mathcal{F}_{2i-1}^j(x) \geq \lambda_{\mathcal{D}} - 2\mu$  for at least one  $j \in [2n]$  and thus  $E_i(x) \leq y_i - \frac{y_i}{\lambda_{\mathcal{D}} - 2\mu}(\lambda_{\mathcal{D}} - 2\mu) = 0$ .

**Property 4.**  $\mathcal{F}(x) = \max_{i \in [N]} \{E_i(x), 0\}$  for  $x \in \mathbb{R}^n$ .

Since  $\max\{x, y\} = x + \sigma(y - x)$  for  $x, y \in \mathbb{R}$  and  $\mathcal{F}_i^j(x) \geq 0$  for all  $i$  and  $j$ , we have that

$$\begin{aligned} \sigma(\mathcal{F}_{2i}^0(x) + \mathcal{F}_{2i}^1(x)) &= \mathcal{F}_{2i}^0(x) + \mathcal{F}_{2i}^1(x) \\ &= \sigma(\mathcal{F}_{2i-1}^0(x)) + \sigma(E_{i-1}(x) - \mathcal{F}_{2i-1}^0(x)) \\ &= \max\{\mathcal{F}_{2i-1}^0(x), E_i(x)\} \\ &= \max\{\sigma(\mathcal{F}_{2i-2}^0(x) + \mathcal{F}_{2i-2}^1(x)), E_i(x)\}. \end{aligned}$$

Using the above equation repeatedly, we have that  $\mathcal{F}(x) = \sigma(\mathcal{F}_{2N}^0(x) + \mathcal{F}_{2N}^1(x)) = \max_{i=1}^N \{E_i(x), \mathcal{F}_2^0(x)\} = \max_{i=1}^N \{E_i(x), 0\}$ .

We now show that  $\mathcal{F}$  satisfies the conditions of the theorem. Let  $x \in \mathbb{B}_\infty(x_s, \mu)$  for  $s \in [N]$ . By Property 2,  $E_s(x) = y_s$ ; and if  $i \neq s$  and  $y_i = y_s$ , then  $E_i(x) < y_s$ . By Property 3, if  $y_i \neq y_s$ , then  $E_i(x) \leq 0$ . By Property 4,  $\mathcal{F}(x) = \max_{i \in [N]} \{E_i(x)\} = E_s(x) = y_s$ ; that is,  $\mathcal{F}$  is robust at  $x_s$  with budget  $\mu$ .

We now estimate the number of nonzero parameters. For  $i \in [N]$ , constructions (i-1.1) and (i-2.1) need 3 parameters; (i-1.2) needs  $8n$  parameters; (i-1.3) and (i-2.3) need  $2n$  parameters; (i-2.2) need  $2n + 2$  parameters. Totally,  $(N - 1)(12n + 5) + 2$  parameters are needed.  $\square$

## A.5. Proofs for Theorem 3.11

We give a lemma below.

**Lemma A.7.** *There exists a network*

$\mathcal{F} \in \mathbf{H}_{n, O(\log n), O(n), O(n)}$  *such that  $\mathcal{F}(x) = \|x\|_\infty$ ; that is, there exists a network  $\mathcal{F} : \mathbb{R}^n \rightarrow \mathbb{R}$  with depth  $O(\log n)$ , width  $O(n)$ , and  $O(n)$  nonzero parameters such that  $\mathcal{F}(x) = \|x\|_\infty$ .*

*Proof.* Let  $e = \lceil \log_2 n \rceil$ . Without loss of generality, we assume that  $n = 2^e$ . Then  $\mathcal{F}$  has depth  $2e$  and for  $i \in [e + 1]$ , the  $(2i - 1)$ -th layer has width  $2^{e-i+2}$ , and the  $2i$ -th layer has width  $2^{e-i+1}$ .

Denote  $W_i$  and  $b_i$  to be the weight matrix and the bias of the  $i$ -th layer of  $\mathcal{F}$ . The first and second layers will change  $x$  to  $|x|$ . The first layer has width  $2^{e+1}$  and the second layer has width  $2^e$ , which are defined below.

$$W_1^{2i,i} = 1 \text{ and } W_1^{2i+1,i} = -1; \text{ other entries of } W_1 \text{ are } 0. \quad b_1 = 0.$$

$$W_2^{i,2i} = 1 \text{ and } W_2^{i,2i+1} = 1; \text{ other entries of } W_2 \text{ are } 0. \quad b_2 = 0.$$

Since  $\sigma(x) + \sigma(-x) = |x|$  for any  $x \in \mathbb{R}$ , it is easy to check that  $\mathcal{F}_2(x) = \sigma(W_2 \sigma(W_1 x)) = |x|$ .

For  $i \in [e]$ , the  $(2i + 1)$ -th and the  $(2i + 2)$ -th layers are defined below.

$$\mathcal{F}_{2i+1}^{2m}(x) = \sigma(\mathcal{F}_{2i}^{2m}(x)), \text{ where } m = 0, 1, \dots, 2^{e-i} - 1.$$

$$\mathcal{F}_{2i+1}^{2m+1}(x) = \sigma(\mathcal{F}_{2i}^{2m+1}(x) - \mathcal{F}_{2i}^{2m}(x)), \text{ where } m = 0, 1, \dots, 2^{e-i} - 1.$$

$$\mathcal{F}_{2i+2}^m(x) = \sigma(\mathcal{F}_{2i+1}^{2m}(x) + \mathcal{F}_{2i+1}^{2m+1}(x)), \text{ where } m = 0, 1, \dots, 2^{e-i} - 1.$$



For  $i \in [e + 1]$ , using  $\sigma(x - y) + y = \max\{x, y\}$  for any  $x, y \in \mathbb{R}$ , we have that

$$\begin{aligned}
 & \mathcal{F}_{2i+2}^m(x) \\
 &= \sigma(\mathcal{F}_{2i+1}^{2m}(x) + \mathcal{F}_{2i+1}^{2m+1}(x)) \\
 &= \mathcal{F}_{2i+1}^{2m}(x) + \mathcal{F}_{2i+1}^{2m+1}(x) \\
 &= \sigma(\mathcal{F}_{2i}^{2m}(x)) + \sigma(\mathcal{F}_{2i}^{2m+1}(x) - \mathcal{F}_{2i}^{2m}(x)) \\
 &= \mathcal{F}_{2i}^{2m}(x) + \sigma(\mathcal{F}_{2i}^{2m+1}(x) - \mathcal{F}_{2i}^{2m}(x)) \\
 &= \max\{\mathcal{F}_{2i}^{2m}(x), \mathcal{F}_{2i}^{2m+1}(x)\}.
 \end{aligned}$$

The  $(2e + 2)$ -th layer has width 1 and is the output

$$\begin{aligned}
 \mathcal{F}(x) &= \mathcal{F}_{2e+2}^1(x) \\
 &= \max\{\mathcal{F}_{2e}^2(x), \mathcal{F}_{2e}^1(x)\} \\
 &= \max\{\mathcal{F}_{2e-2}^4(x), \mathcal{F}_{2e-2}^3(x), \mathcal{F}_{2e-2}^2(x), \mathcal{F}_{2e-2}^1(x)\} \\
 &= \dots \\
 &= \max\{\mathcal{F}_2^{2^e}(x), \mathcal{F}_2^{2^e-1}(x), \dots, \mathcal{F}_2^2(x), \mathcal{F}_2^1(x)\} \\
 &= \|x\|_\infty.
 \end{aligned}$$

We now estimate the number of parameters. The first two layers need  $4d$  nonzero parameters. For  $i \in [e]$ , the  $(2i + 1)$ -th layer and  $(2i + 2)$ -th layer need  $5 \cdot 2^{e-i}$  parameters. So, we need  $\sum_{i=1}^e 5 \cdot 2^{e-i} = O(2^e) = O(n)$  parameters. Then the lemma is proved.  $\square$

We restate the theorem for convenience.

**Theorem A.8.** *For any dataset  $\mathcal{D} \in \mathcal{B}_{n,N}$ , the hypothesis space  $\mathbf{H}_{n,O(N \log(n)),O(n),O(Nn \log(n))}$  contains a network  $\mathcal{F}$  which is an optimal robust memorization of  $\mathcal{D}$  via Lipschitz; that is,  $\mathcal{F}$  is a memorization of  $\mathcal{D}$  and  $\text{Lip}_\infty(\mathcal{F}) = 2/\lambda_{\mathcal{D}}$ .*

*Proof.* Let  $\mathcal{D}$  be defined in section 3.4 and  $C \in \mathbb{R}_+$  satisfy  $C + x_i^{(k)} - 0.5\lambda_{\mathcal{D}} > 0$  for all  $i \in [N], k \in [n]$ . The network has  $N(2\lceil \log(n) \rceil + 5) + 1$  hidden layers which will be defined below.

**Step 1.** The first layer has width  $n + 1$ :  $\mathcal{F}_1^0(x) = 2$  and  $\mathcal{F}_1^j(x) = \sigma(x^{(j)} + C) = x^{(j)} + C$ , where  $j \in [n]$ .

**Step 2.** Let  $s_k = (2\lceil \log(n) \rceil + 5)(k - 1) + 2$ . For  $k \in [N]$ , we will use the  $s_k$ -th layer to the  $(s_k + 2\lceil \log(n) \rceil + 4)$ -th layer to check if  $\|x - x_k\|_\infty < 0.5\lambda_{\mathcal{D}}$ . Step 2 consists of three sub-steps.

**Step 2a.** We use the  $s_k$ -th layer and the  $(s_k + 1)$ -th layer to calculate  $|x - x_k|$ . The  $s_k$ -th layer has width  $3n + 1$  and is defined below.

$$\begin{aligned}
 & \mathcal{F}_{s_k}^0(x) = \sigma(\mathcal{F}_{s_k-1}^0(x)); \\
 & \mathcal{F}_{s_k}^j(x) = \sigma(\mathcal{F}_{s_k-1}^j(x) - x_k^{(j)} - C), \text{ where } j \in [n]; \\
 & \mathcal{F}_{s_k}^{n+j}(x) = \sigma(-\mathcal{F}_{s_k-1}^j(x) + x_k^{(j)} + C), \text{ where } j \in [n]; \\
 & \mathcal{F}_{s_k}^{2n+j}(x) = \sigma(\mathcal{F}_{s_k-1}^j(x)), \text{ where } j \in [n].
 \end{aligned}$$

The  $(s_k + 1)$ -th layer has width  $2n + 1$  and is defined below.

$$\begin{aligned}
 & \mathcal{F}_{s_k+1}^0(x) = \sigma(\mathcal{F}_{s_k}^0(x)); \\
 & \mathcal{F}_{s_k+1}^j(x) = \sigma(\mathcal{F}_{s_k}^j(x) + \mathcal{F}_{s_k}^{n+j}(x)), \text{ where } j \in [n]; \\
 & \mathcal{F}_{s_k+1}^{n+j}(x) = \sigma(\mathcal{F}_{s_k}^{2n+j}(x)), \text{ where } j \in [n].
 \end{aligned}$$

The  $s_k$ -th layer needs  $5n + 1$  nonzeros parameters and  $(s_k + 1)$ -th layer needs  $3n + 1$  nonzeros parameters.

**Step 2b.** Lemma A.7 is used to calculate  $\|x - x_k\|_\infty$ . By Lemma A.7, there exists a network  $\mathcal{H} : \mathbb{R}^n \rightarrow \mathbb{R}$  with  $2\lceil \log(n) \rceil$  hidden layers, width  $O(n)$ , and  $O(n)$  nonzero parameters to compute  $\mathcal{H}(x) = \|x\|_\infty$  for  $x \in \mathbb{R}^n$ . Since  $\mathcal{H}$  has  $2\lceil \log(n) \rceil$  hidden layers, we set the output of the  $(s_k + 2\lceil \log(n) \rceil + 1)$ -th layer to be

$$\begin{aligned}\mathcal{F}_{s_k+2\lceil \log(n) \rceil+1}^0(x) &= \sigma(\mathcal{F}_{s_k+1}^0(x)); \\ \mathcal{F}_{s_k+2\lceil \log(n) \rceil+1}^1(x) &= \mathcal{H}(\mathcal{F}_{s_k+1}^1(x), \dots, \mathcal{F}_{s_k+1}^n(x)) = \|\mathcal{F}_{s_k+1}(x)\|_\infty; \\ \mathcal{F}_{s_k+2\lceil \log(n) \rceil+1}^{j+1}(x) &= \sigma(\mathcal{F}_{s_k+1}^{n+j}(x)), \text{ where } j \in [n].\end{aligned}$$

**Step 2c.** Use the  $(s_k + 2\lceil \log(n) \rceil + 2)$ -th to the  $(s_k + 2\lceil \log(n) \rceil + 4)$ -th layers to check if  $\|x - x_k\|_\infty < 0.5\lambda_{\mathcal{D}}$ . The  $(s_k + 2\lceil \log(n) \rceil + 2)$ -th layer has width  $n + 4$  and is defined below

$$\begin{aligned}\mathcal{F}_{s_k+2\lceil \log(n) \rceil+2}^0(x) &= \sigma(\mathcal{F}_{s_k+2\lceil \log(n) \rceil+1}^0(x)); \\ \mathcal{F}_{s_k+2\lceil \log(n) \rceil+2}^1(x) &= \sigma(-2/\lambda_{\mathcal{D}}\mathcal{F}_{s_k+2\lceil \log(n) \rceil+1}^1(x) + 1); \\ \mathcal{F}_{s_k+2\lceil \log(n) \rceil+2}^2(x) &= \sigma(\mathcal{F}_{s_k+2\lceil \log(n) \rceil+1}^0(x) - 2); \\ \mathcal{F}_{s_k+2\lceil \log(n) \rceil+2}^3(x) &= \sigma(-\mathcal{F}_{s_k+2\lceil \log(n) \rceil+1}^0(x) + 2); \\ \mathcal{F}_{s_k+2\lceil \log(n) \rceil+2}^{j+3}(x) &= \sigma(\mathcal{F}_{s_k+2\lceil \log(n) \rceil+1}^{j+1}(x)), \text{ where } j \in [n].\end{aligned}$$

The  $(s_k + 2\lceil \log(n) \rceil + 3)$ -th layer has width  $n + 3$  and is defined below

$$\begin{aligned}\mathcal{F}_{s_k+2\lceil \log(n) \rceil+3}^0(x) &= \sigma(\mathcal{F}_{s_k+2\lceil \log(n) \rceil+2}^0(x) + y_k\mathcal{F}_{s_k+2\lceil \log(n) \rceil+2}^1(x)); \\ \mathcal{F}_{s_k+2\lceil \log(n) \rceil+3}^1(x) &= \sigma(\mathcal{F}_{s_k+2\lceil \log(n) \rceil+2}^1(x)); \\ \mathcal{F}_{s_k+2\lceil \log(n) \rceil+3}^2(x) &= \sigma(\mathcal{F}_{s_k+2\lceil \log(n) \rceil+2}^1(x) - (\mathcal{F}_{s_k+2\lceil \log(n) \rceil+2}^2(x) + \mathcal{F}_{s_k+2\lceil \log(n) \rceil+2}^3(x))); \\ \mathcal{F}_{s_k+2\lceil \log(n) \rceil+3}^{j+2}(x) &= \sigma(\mathcal{F}_{s_k+2\lceil \log(n) \rceil+2}^{j+3}(x)), \text{ where } j \in [n].\end{aligned}$$

The  $(s_k + 2\lceil \log(n) \rceil + 4)$ -th layer has width  $n + 1$  and is defined as

$$\begin{aligned}\mathcal{F}_{s_k+2\lceil \log(n) \rceil+4}^0(x) &= \sigma(\mathcal{F}_{s_k+2\lceil \log(n) \rceil+3}^0(x) - y_k(\mathcal{F}_{s_k+2\lceil \log(n) \rceil+3}^1(x) - \mathcal{F}_{s_k+2\lceil \log(n) \rceil+3}^2(x))); \\ \mathcal{F}_{s_k+2\lceil \log(n) \rceil+4}^j(x) &= \sigma(\mathcal{F}_{s_k+2\lceil \log(n) \rceil+3}^{j+2}(x)), \text{ where } j \in [n].\end{aligned}$$

It is easy to check that if  $\mathcal{F}_{s_k+1}^j(x) = |x^{(j)} - x_k^{(j)}|$ . Then

$$\mathcal{F}_{s_k+2\lceil \log(n) \rceil+2}^1(x) = \sigma(-2/\lambda_{\mathcal{D}}\mathcal{F}_{s_k+2\lceil \log(n) \rceil+1}^1(x) + 1) > 0$$

if and only if  $\|x - x_k\|_\infty < 0.5\lambda_{\mathcal{D}}$ . These three layers need  $3n + 16$  nonzeros parameters.

**Step 3.** The output is  $\mathcal{F}(x) = \mathcal{F}_{s_N+2\lceil \log(n) \rceil+4}^0(x) - 2$ . The network  $\mathcal{F}$  has width  $O(n)$ , depth  $O(N \log(n))$ , and  $O(Nn \log(n))$  nonzeros parameters.

We now show that  $\mathcal{F}$  satisfies the condition of the theorem; that is  $\mathcal{F}$  memorizes  $\mathcal{D}$  and satisfies  $\text{Lip}_\infty(\mathcal{F}) = 2/\lambda_{\mathcal{D}}$ .

**Property 1.**  $\mathcal{F}_{s_k-1}^j(x) = x^{(j)} + C$  for  $j \in [n]$  and  $k \in [N]$ . When  $k = 1$ ,  $s_k - 1 = 1$ . By Step 1, we have that  $\mathcal{F}_{s_1-1}^j(x) = \mathcal{F}_1^j(x) = x^{(j)} + C$ . When  $k > 1$ , we have that

$$\begin{aligned}\mathcal{F}_{s_k+1-1}^j(x) &= \sigma(\mathcal{F}_{s_k+2\lceil \log(n) \rceil+4}^{j+2}(x)) = \sigma(\mathcal{F}_{s_k+2\lceil \log(n) \rceil+3}^{j+2}(x)) \\ &= \sigma(\mathcal{F}_{s_k+2\lceil \log(n) \rceil+2}^{j+3}(x)) = \sigma(\mathcal{F}_{s_k+2\lceil \log(n) \rceil+1}^{j+1}(x)) \\ &= \sigma(\mathcal{F}_{s_k+1}^{n+j}(x)) = \sigma(\mathcal{F}_{s_k}^{2n+j}(x)) = \sigma(\mathcal{F}_{s_k-1}^j(x)) \\ &= \mathcal{F}_{s_k-1}^j(x).\end{aligned}$$

Then,  $\mathcal{F}_{s_{k+1}-1}^j(x) = \mathcal{F}_{s_k-1}^j(x) = \dots = \mathcal{F}_{s_1-1}^j(x) = \mathcal{F}_1^j(x) = x^{(j)} + C$ .

**Property 2.**  $\mathcal{F}_{s_k+1}^j(x) = |x^{(j)} - x_k^{(j)}|$  and  $\mathcal{F}_{s_k+2\lceil\log(n)\rceil+1}^1(x) = \|x - x_k\|_\infty$  for  $j \in [n]$ .

Since  $\sigma(x) + \sigma(-x) = |x|$  for any  $x \in \mathbb{R}$ , from Step 2a,  $\mathcal{F}_{s_k+1}^j(x) = |\mathcal{F}_{s_k-1}^j(x) - x_k^{(j)} - C|$  for  $j \in [n]$ . By Property 1,  $\mathcal{F}_{s_k-1}^j(x) = x^{(j)} + C$  for  $j \in [n]$ . Then,  $\mathcal{F}_{s_k+1}^j(x) = |x^{(j)} - x_k^{(j)}|$  for  $j \in [n]$ . From Step 2b, we have that  $\mathcal{F}_{s_k+2\lceil\log(n)\rceil+1}^1(x) = \|x - x_k\|_\infty$  for  $j \in [n]$ .

**Property 3.**  $\mathcal{F}_{s_k+2\lceil\log(n)\rceil+4}^0(x) = 2 + y_{w_k} \sigma(1 - 2/\lambda_{\mathcal{D}} \|x - x_{w_k}\|_\infty)$ , where  $w_k = \operatorname{argmin}_{i \in [k]} \|x - x_i\|_\infty$ .

We prove the property by induction on  $k$ . We first show that the statement is valid for  $k = 1$ . We have that  $w_k = 1$  and  $\mathcal{F}_{s_1+2\lceil\log(n)\rceil+2}^0(x) = \mathcal{F}_{s_1+2\lceil\log(n)\rceil+1}^0(x) = \mathcal{F}_{s_1+1}^0(x) = \mathcal{F}_{s_1}^0(x) = \mathcal{F}_{s_1-1}^0(x) = 2$ . From Step 2c and Property 2,

$$\begin{aligned} & \mathcal{F}_{s_1+2\lceil\log(n)\rceil+3}^0(x) \\ &= \sigma(\mathcal{F}_{s_1+2\lceil\log(n)\rceil+2}^0(x) + y_0 \mathcal{F}_{s_1+2\lceil\log(n)\rceil+2}^1(x)) \\ &= \sigma(2 + y_0 \sigma(1 - 2/\lambda_{\mathcal{D}} \mathcal{F}_{s_1+2\lceil\log(n)\rceil+1}^1(x))) \\ &= 2 + y_0 \sigma(-2/\lambda_{\mathcal{D}} \mathcal{F}_{s_1+2\lceil\log(n)\rceil+1}^1(x) + 1) \\ &= 2 + y_0 \sigma(1 - 2/\lambda_{\mathcal{D}} \|x - x_0\|_\infty). \end{aligned}$$

Since  $\mathcal{F}_{s_1+2\lceil\log(n)\rceil+2}^2(x) = \sigma(\mathcal{F}_{s_1+2\lceil\log(n)\rceil+1}^0(x) - 2) = \sigma(2 - 2) = 0$  and  $\mathcal{F}_{s_1+2\lceil\log(n)\rceil+2}^3(x) = \sigma(-\mathcal{F}_{s_1+2\lceil\log(n)\rceil+1}^0(x) + 2) = \sigma(2 - 2) = 0$ , we have that  $\mathcal{F}_{s_1+2\lceil\log(n)\rceil+3}^2(x) = \sigma(\mathcal{F}_{s_1+2\lceil\log(n)\rceil+2}^1(x) - (\mathcal{F}_{s_1+2\lceil\log(n)\rceil+2}^2(x) + \mathcal{F}_{s_1+2\lceil\log(n)\rceil+2}^3(x))) = \sigma(\mathcal{F}_{s_1+2\lceil\log(n)\rceil+2}^1(x)) = \mathcal{F}_{s_1+2\lceil\log(n)\rceil+3}^1(x)$ . Then

$$\begin{aligned} & \mathcal{F}_{s_1+2\lceil\log(n)\rceil+4}^0(x) \\ &= \sigma(\mathcal{F}_{s_1+2\lceil\log(n)\rceil+3}^0(x) - y_0(\mathcal{F}_{s_1+2\lceil\log(n)\rceil+3}^1(x) - \mathcal{F}_{s_1+2\lceil\log(n)\rceil+3}^2(x))) \\ &= \mathcal{F}_{s_1+2\lceil\log(n)\rceil+3}^0(x) \\ &= 2 + y_0 \sigma(1 - 2/\lambda_{\mathcal{D}} \|x - x_0\|_\infty). \end{aligned}$$

We have proved the statement for  $k = 1$ .

Assume that the statement is valid for  $k - 1$ ; that is,  $\mathcal{F}_{s_{k-1}+2\lceil\log(n)\rceil+4}^0(x) = 2 + y_{w_{k-1}} \sigma(1 - 2/\lambda_{\mathcal{D}} \|x - x_{w_{k-1}}\|_\infty)$ . We have that  $\mathcal{F}_{s_k+2\lceil\log(n)\rceil+2}^0(x) = \mathcal{F}_{s_k+2\lceil\log(n)\rceil+1}^0(x) = \mathcal{F}_{s_k+1}^0(x) = \mathcal{F}_{s_k}^0(x) = \mathcal{F}_{s_k-1}^0(x) = 2 + y_{w_{k-1}} \sigma(1 - 2/\lambda_{\mathcal{D}} \|x - x_{w_{k-1}}\|_\infty) \geq 1$ , and we also have that  $\mathcal{F}_{s_k+2\lceil\log(n)\rceil+2}^1(x) = \sigma(-2/\lambda_{\mathcal{D}} \mathcal{F}_{s_k+2\lceil\log(n)\rceil+1}^1(x) + 1) \leq 1$ . Then

$$\begin{aligned} & \mathcal{F}_{s_k+2\lceil\log(n)\rceil+3}^0(x) \\ &= \sigma(\mathcal{F}_{s_k+2\lceil\log(n)\rceil+2}^0(x) + y_k \mathcal{F}_{s_k+2\lceil\log(n)\rceil+2}^1(x)) \\ &= \sigma(\mathcal{F}_{s_k+2\lceil\log(n)\rceil+2}^0(x) + y_k \sigma(1 - 2/\lambda_{\mathcal{D}} \mathcal{F}_{s_k+2\lceil\log(n)\rceil+1}^1(x))) \\ &= \mathcal{F}_{s_k+2\lceil\log(n)\rceil+2}^0(x) + y_k \sigma(1 - 2/\lambda_{\mathcal{D}} \mathcal{F}_{s_k+2\lceil\log(n)\rceil+1}^1(x)) \\ &= \mathcal{F}_{s_k-1}^0(x) + y_k \sigma(1 - 2/\lambda_{\mathcal{D}} \mathcal{F}_{s_k+2\lceil\log(n)\rceil+1}^1(x)) \\ &= \mathcal{F}_{s_k-1}^0(x) + y_k \mathcal{F}_{s_k+2\lceil\log(n)\rceil+2}^1(x) \end{aligned} \tag{23}$$

Since  $\mathcal{F}_{s_k+2\lceil\log(n)\rceil+2}^2(x) = \sigma(\mathcal{F}_{s_k+2\lceil\log(n)\rceil+1}^0(x) - 2)$  and  $\mathcal{F}_{s_k+2\lceil\log(n)\rceil+2}^3(x) = \sigma(-\mathcal{F}_{s_k+2\lceil\log(n)\rceil+1}^0(x) + 2)$ , we have that  $\mathcal{F}_{s_k+2\lceil\log(n)\rceil+3}^2(x) = \sigma(\mathcal{F}_{s_k+2\lceil\log(n)\rceil+2}^1(x) - (\mathcal{F}_{s_k+2\lceil\log(n)\rceil+2}^2(x) + \mathcal{F}_{s_k+2\lceil\log(n)\rceil+2}^3(x))) = \sigma(\mathcal{F}_{s_k+2\lceil\log(n)\rceil+2}^1(x)) = \mathcal{F}_{s_k+2\lceil\log(n)\rceil+3}^1(x)$ .

$|\mathcal{F}_{s_k+2\lceil\log(n)\rceil+1}^0(x) - 2|$ ). Then

$$\begin{aligned}
 & \mathcal{F}_{s_k+2\lceil\log(n)\rceil+4}^0(x) \\
 = & \sigma(\mathcal{F}_{s_k+2\lceil\log(n)\rceil+3}^0(x) - \\
 & y_k(\mathcal{F}_{s_k+2\lceil\log(n)\rceil+3}^1(x) - \mathcal{F}_{s_k+2\lceil\log(n)\rceil+3}^2(x))) \\
 = & \sigma(\mathcal{F}_{s_k-1}^0(x) + y_k\mathcal{F}_{s_k+2\lceil\log(n)\rceil+2}^1(x) \\
 & - y_k(\mathcal{F}_{s_k+2\lceil\log(n)\rceil+2}^1(x) - \sigma(\mathcal{F}_{s_k+2\lceil\log(n)\rceil+2}^1(x) - \\
 & |\mathcal{F}_{s_k-1}^0(x) - 2|))) .
 \end{aligned}$$

We divide the proof into two cases.

**Case 1.** If  $x \notin \mathbb{B}_\infty(x_k, 0.5\lambda_{\mathcal{D}})$ , then  $\mathcal{F}_{s_k+2\lceil\log(n)\rceil+2}^1(x) = \sigma(-2/\lambda_{\mathcal{D}}\mathcal{F}_{s_k+2\lceil\log(n)\rceil+1}^1(x) + 1) = \sigma(1 - 2/\lambda_{\mathcal{D}}\|x - x_k\|_\infty) = 0$  and

$$\begin{aligned}
 & \mathcal{F}_{s_k+2\lceil\log(n)\rceil+4}^0(x) \\
 = & \sigma(\mathcal{F}_{s_k-1}^0(x) + y_k\mathcal{F}_{s_k+2\lceil\log(n)\rceil+2}^1(x) \\
 & - y_k(\mathcal{F}_{s_k+2\lceil\log(n)\rceil+2}^1(x) - \\
 & \sigma(\mathcal{F}_{s_k+2\lceil\log(n)\rceil+2}^1(x) - |\mathcal{F}_{s_k-1}^0(x) - 2|))) \\
 = & \mathcal{F}_{s_k-1}^0(x) \\
 = & \mathcal{F}_{s_k-1+2\lceil\log(n)\rceil+4}^0(x) \\
 = & 2 + y_{w_{k-1}}\sigma(1 - 2/\lambda_{\mathcal{D}}\|x - x_{w_{k-1}}\|_\infty) \\
 = & 2 + y_{w_k}\sigma(1 - 2/\lambda_{\mathcal{D}}\|x - x_{w_k}\|_\infty).
 \end{aligned}$$

**Case 2.** If  $x \in \mathbb{B}_\infty(x_k, 0.5\lambda_{\mathcal{D}})$ , then  $\mathcal{F}_{s_k+2\lceil\log(n)\rceil+2}^1(x) = \sigma(-2/\lambda_{\mathcal{D}}\mathcal{F}_{s_k+2\lceil\log(n)\rceil+1}^1(x) + 1) = \sigma(1 - 2/\lambda_{\mathcal{D}}\|x - x_k\|_\infty) \geq 0$  and using equation 23:

$$\begin{aligned}
 & \mathcal{F}_{s_k+2\lceil\log(n)\rceil+4}^0(x) \\
 = & \sigma(\mathcal{F}_{s_k-1}^0(x) + y_k\mathcal{F}_{s_k+2\lceil\log(n)\rceil+2}^1(x) \\
 & - y_k(\mathcal{F}_{s_k+2\lceil\log(n)\rceil+2}^1(x) - \sigma(\mathcal{F}_{s_k+2\lceil\log(n)\rceil+2}^1(x) - \\
 & - |\mathcal{F}_{s_k-1}^0(x) - 2|))) \\
 = & \sigma(\mathcal{F}_{s_k-1}^0(x) + y_k\mathcal{F}_{s_k+2\lceil\log(n)\rceil+2}^1(x) \\
 & - y_k(\min\{\mathcal{F}_{s_k+2\lceil\log(n)\rceil+2}^1(x), |2 - \mathcal{F}_{s_k-1}^0(x)|\})) \\
 = & \sigma(2 + y_{w_{k-1}}\sigma(1 - 2/\lambda_{\mathcal{D}}\|x - x_{w_{k-1}}\|_\infty) + \\
 & y_k(1 - 2/\lambda_{\mathcal{D}}\|x - x_k\|_\infty) \\
 & - y_k(\min\{1 - 2/\lambda_{\mathcal{D}}\|x - x_k\|_\infty, \\
 & \sigma(1 - 2/\lambda_{\mathcal{D}}\|x - x_{w_{k-1}}\|_\infty)\})).
 \end{aligned}$$

Consider two sub-cases:

**Case 2.1.** If  $\|x - x_{w_{k-1}}\|_\infty > 0.5\lambda_{\mathcal{D}}$ , then  $w_k = k$  and hence

$$\begin{aligned}
 & \mathcal{F}_{s_k+2\lceil\log(n)\rceil+4}^0(x) \\
 = & \sigma(2 + y_{w_{k-1}} \sigma(1 - 2/\lambda_{\mathcal{D}} \|x - x_{w_{k-1}}\|_\infty) + \\
 & y_k(1 - 2/\lambda_{\mathcal{D}} \|x - x_k\|_\infty) \\
 & - y_k(\min\{1 - 2/\lambda_{\mathcal{D}} \|x - x_k\|_\infty, \\
 & \sigma(1 - 2/\lambda_{\mathcal{D}} \|x - x_{w_{k-1}}\|_\infty)\})) \\
 = & \sigma(2 + y_k(1 - 2/\lambda_{\mathcal{D}} \|x - x_k\|_\infty)) \\
 = & 2 + y_k(1 - 2/\lambda_{\mathcal{D}} \|x - x_k\|_\infty) \\
 = & 2 + y_{w_k}(1 - 2/\lambda_{\mathcal{D}} \|x - x_{w_k}\|_\infty).
 \end{aligned}$$

**Case 2.2.** If  $\|x - x_{w_{k-1}}\|_\infty \leq 0.5\lambda_{\mathcal{D}}$ , then  $y_{w_{k-1}} = y_k$  and hence

$$\begin{aligned}
 & \mathcal{F}_{s_k+2\lceil\log(n)\rceil+4}^0(x) \\
 = & \sigma(2 + y_{w_{k-1}} \sigma(1 - 2/\lambda_{\mathcal{D}} \|x - x_{w_{k-1}}\|_\infty) + \\
 & y_k(1 - 2/\lambda_{\mathcal{D}} \|x - x_k\|_\infty) \\
 & - y_k(\min\{1 - 2/\lambda_{\mathcal{D}} \|x - x_k\|_\infty, \\
 & \sigma(1 - 2/\lambda_{\mathcal{D}} \|x - x_{w_{k-1}}\|_\infty)\})) \\
 = & \sigma(2 + y_{w_{k-1}}(1 - 2/\lambda_{\mathcal{D}} \|x - x_{w_{k-1}}\|_\infty) \\
 & + y_k(1 - 2/\lambda_{\mathcal{D}} \|x - x_k\|_\infty) \\
 & - y_k(\min\{1 - 2/\lambda_{\mathcal{D}} \|x - x_k\|_\infty, \\
 & 1 - 2/\lambda_{\mathcal{D}} \|x - x_{w_{k-1}}\|_\infty\})) \\
 = & 2 + y_k \max\{1 - 2/\lambda_{\mathcal{D}} \|x - x_k\|_\infty, \\
 & 1 - 2/\lambda_{\mathcal{D}} \|x - x_{w_{k-1}}\|_\infty\} \\
 = & 2 + y_{w_k} \sigma(1 - 2/\lambda_{\mathcal{D}} \|x - x_{w_k}\|_\infty).
 \end{aligned}$$

The property is proved.

**Property 4.**  $\mathcal{F}$  is a memorization  $\mathcal{D}$  and has  $\text{Lip}_\infty(\mathcal{F}) = 2/\lambda_{\mathcal{D}}$ .

By Property 3, the output is

$$\mathcal{F}(x) = \mathcal{F}_{s_N+2\lceil\log(n)\rceil+4}^1(x) - 2 = y_{w_N} \sigma(1 - 2/\lambda_{\mathcal{D}} \|x - x_{w_N}\|_\infty)$$

where  $w_N = \operatorname{argmin}_{i \in [N]} \|x - x_i\|_\infty$ .

If  $x = x_s$ , then  $w_N = s$  and  $\mathcal{F}(x) = y_s$ ; that is,  $\mathcal{F}$  memorizes  $\mathcal{D}$ . If  $x \in \mathbb{B}(x_s, 0.5\lambda_{\mathcal{D}})$  for some  $s \in [N]$ , then  $w_N \in [N]$  and  $\mathcal{F}(x) = y_{w_N}(1 - 2/\lambda_{\mathcal{D}} \|x - x_{w_N}\|_\infty)$  such that the local  $\text{Lip}_\infty(\mathcal{F}) = 2/\lambda_{\mathcal{D}}$  over  $\mathbb{B}(x_{w_N}, 0.5\lambda_{\mathcal{D}})$ . If  $x$  is not in  $\cup_{i=1}^N \mathbb{B}(x_i, 0.5\lambda_{\mathcal{D}})$ , then  $\|x - x_{w_N}\|_\infty > 0.5\lambda_{\mathcal{D}}$ . Hence  $\mathcal{F}(x) = 0$  and the local  $\text{Lip}_\infty(\mathcal{F}) = 0$ . The theorem is proved.  $\square$
